# Supplementary material for: Fluorescent Anti-CEA Nanobody for Rapid Tumor-Targeting and Imaging in Mouse Models of Pancreatic Cancer
Source: MDPI journal article supplement (doi:10.3390/biom12050711), 2022-05-16
Supplement: s1 [file s1]

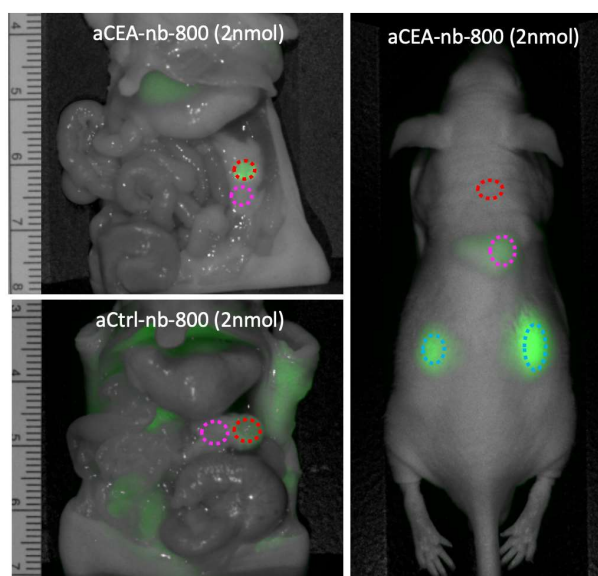

**Figure S1.** Sample regions of interest in orthotopic and subcutaneous patient derived xenograft mouse models
